# Supplementary figures and images for: Inversion variants in the human genome: role in disease and genome architecture
Source: Springer Nature journal article supplement (doi:10.1186/gm132), 2010-01-01

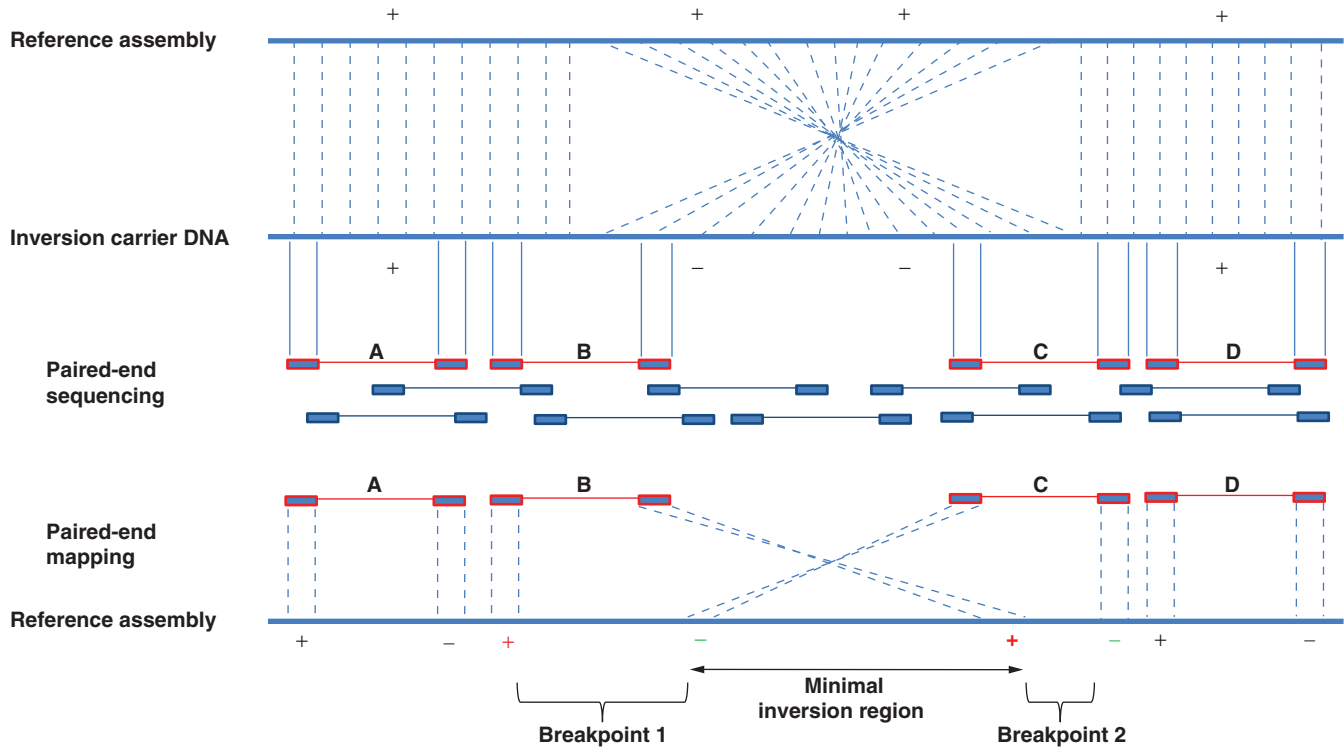

Supplement: 13073_2010_132_MOESM1_ESM.pdf [file 13073_2010_132_MOESM1_ESM.pdf]

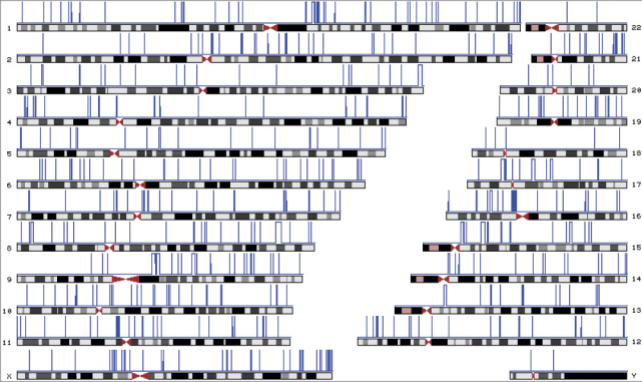

Supplement: 13073_2010_132_MOESM2_ESM.pdf [file 13073_2010_132_MOESM2_ESM.pdf]

**(a)**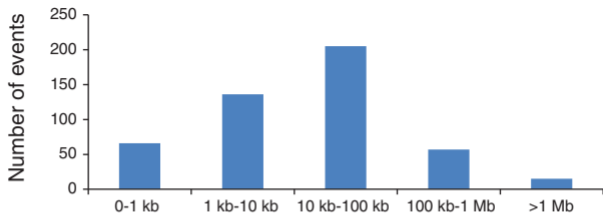**(b)**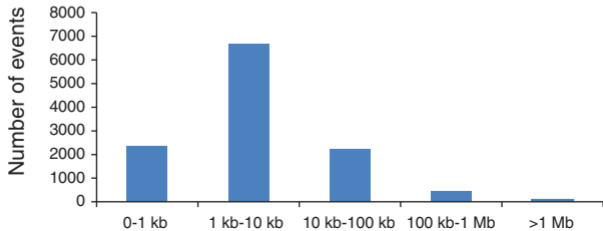

Supplement: 13073_2010_132_MOESM3_ESM.pdf [file 13073_2010_132_MOESM3_ESM.pdf]
